# Supplementary material for: Harnessing Whole Genome Polygenic Risk Scores to Stratify Individuals Based on Cardiometabolic Risk Factors and Biomarkers at Age 10 in the Lifecourse—Brief Report
Source: PubMed Central journal article supplement (PMC8860202; doi:10.1161/atvbaha.121.316650), 2022-01-20
Supplement: atv-42-362-s001.pdf [file atv-42-362-s001.pdf]

## SUPPLEMENTAL MATERIALS

### **Harnessing whole genome polygenic risk scores to stratify individuals based on cardiometabolic risk factors and biomarkers at age 10 in the lifecourse**

Tom G Richardson<sup>1,2,3,\*</sup>, Katie O’Nunain<sup>1</sup>, Caroline L Relton<sup>1,2</sup>, George Davey Smith<sup>1,2</sup>

<sup>1</sup> *Bristol Medical School, University of Bristol, Oakfield House, Oakfield Grove, Bristol, BS8 2BN, United Kingdom*

<sup>2</sup> *MRC Integrative Epidemiology Unit (IEU), Population Health Sciences, Bristol Medical School, University of Bristol, Oakfield House, Oakfield Grove, Bristol, BS8 2BN, United Kingdom*

<sup>3</sup> *Novo Nordisk Research Centre, Headington, Oxford, OX3 7FZ, United Kingdom*

**Table S1: UK Biobank traits**

| Trait                    | UK Biobank ID | Sample size | Link                                                                                                                              |
|--------------------------|---------------|-------------|-----------------------------------------------------------------------------------------------------------------------------------|
| Body mass index          | 21001         | 461460      | <a href="https://biobank.ndph.ox.ac.uk/showcase/field.cgi?id=21001">https://biobank.ndph.ox.ac.uk/showcase/field.cgi?id=21001</a> |
| Systolic blood pressure  | 4080          | 436419      | <a href="https://biobank.ndph.ox.ac.uk/showcase/field.cgi?id=4080">https://biobank.ndph.ox.ac.uk/showcase/field.cgi?id=4080</a>   |
| Diastolic blood pressure | 4079          | 436424      | <a href="https://biobank.ndph.ox.ac.uk/showcase/field.cgi?id=4079">https://biobank.ndph.ox.ac.uk/showcase/field.cgi?id=4079</a>   |
| High density lipoprotein | 30760         | 403943      | <a href="https://biobank.ndph.ox.ac.uk/showcase/field.cgi?id=30760">https://biobank.ndph.ox.ac.uk/showcase/field.cgi?id=30760</a> |
| Low density lipoprotein  | 30780         | 440546      | <a href="https://biobank.ndph.ox.ac.uk/showcase/field.cgi?id=30780">https://biobank.ndph.ox.ac.uk/showcase/field.cgi?id=30780</a> |
| Triglycerides            | 30870         | 441016      | <a href="https://biobank.ndph.ox.ac.uk/showcase/field.cgi?id=30870">https://biobank.ndph.ox.ac.uk/showcase/field.cgi?id=30870</a> |
| Apolipoprotein A-I       | 30630         | 393193      | <a href="https://biobank.ndph.ox.ac.uk/showcase/field.cgi?id=30630">https://biobank.ndph.ox.ac.uk/showcase/field.cgi?id=30630</a> |
| Apolipoprotein B         | 30640         | 439214      | <a href="https://biobank.ndph.ox.ac.uk/showcase/field.cgi?id=30640">https://biobank.ndph.ox.ac.uk/showcase/field.cgi?id=30640</a> |
| C-reactive protein       | 30710         | 438131      | <a href="https://biobank.ndph.ox.ac.uk/showcase/field.cgi?id=30710">https://biobank.ndph.ox.ac.uk/showcase/field.cgi?id=30710</a> |
| Vitamin D                | 30890         | 419718      | <a href="https://biobank.ndph.ox.ac.uk/showcase/field.cgi?id=30890">https://biobank.ndph.ox.ac.uk/showcase/field.cgi?id=30890</a> |

**Table S2: Raw trait characteristics in the ALSPAC cohort prior to data cleaning**

| Trait                                | Sample size | Mean   | SD    |
|--------------------------------------|-------------|--------|-------|
| Body mass index (kg/m <sup>2</sup> ) | 6219        | 17.68  | 2.84  |
| Systolic blood pressure (mmHg)       | 6201        | 102.72 | 9.26  |
| Diastolic blood pressure (mmHg)      | 6204        | 57.38  | 6.36  |
| High density lipoprotein (mmol/L)    | 4553        | 1.4    | 0.31  |
| Low density lipoprotein (mmol/L)     | 4011        | 2.35   | 0.61  |
| Triglycerides (mmol/L)               | 4011        | 1.14   | 0.57  |
| Apolipoprotein A-I (g/L)             | 4011        | 136.13 | 19.97 |
| Apolipoprotein B (g/L)               | 4011        | 59.27  | 13.27 |
| C-reactive protein (mg/L)            | 4011        | 0.71   | 1.96  |
| Vitamin D (nmol/L)                   | 4011        | 61.32  | 19.88 |
| non-HDL cholesterol (mmol/L)         | 4011        | 2.87   | 0.67  |

**Table S3: Linear regression results adjusted for age and sex**

| Trait                    | Beta  | SE    | P        |
|--------------------------|-------|-------|----------|
| Body mass index          | 0.040 | 0.002 | 5.54E-93 |
| Systolic blood pressure  | 0.014 | 0.001 | 8.86E-30 |
| Diastolic blood pressure | 0.017 | 0.001 | 5.72E-31 |
| High density lipoprotein | 0.068 | 0.003 | 2.29E-90 |
| Low density lipoprotein  | 0.061 | 0.004 | 1.21E-51 |
| Triglycerides            | 0.072 | 0.007 | 3.63E-27 |
| Apolipoprotein A-I       | 0.041 | 0.002 | 3.80E-73 |
| Apolipoprotein B         | 0.063 | 0.003 | 9.83E-73 |
| C-reactive protein       | 0.214 | 0.018 | 1.63E-31 |
| Vitamin D                | 0.044 | 0.005 | 2.98E-16 |

**Table S4: Linear regression results adjusted for age, sex and the top 10 principal components**

| Trait                    | Beta  | SE    | P        |
|--------------------------|-------|-------|----------|
| Body mass index          | 0.041 | 0.002 | 2.06E-87 |
| Systolic blood pressure  | 0.014 | 0.001 | 1.28E-27 |
| Diastolic blood pressure | 0.017 | 0.002 | 2.95E-27 |
| High density lipoprotein | 0.061 | 0.004 | 1.22E-45 |
| Low density lipoprotein  | 0.069 | 0.003 | 6.82E-84 |
| Triglycerides            | 0.077 | 0.007 | 6.95E-28 |
| Apolipoprotein A-I       | 0.041 | 0.002 | 3.65E-65 |
| Apolipoprotein B         | 0.063 | 0.004 | 5.13E-65 |
| C-reactive protein       | 0.045 | 0.006 | 4.39E-16 |
| Vitamin D                | 0.214 | 0.019 | 4.81E-29 |

**Table S5: Proportion of variance explained by baseline and polygenic risk score (PRS) models**

| Trait                    | r2 values |                 |            |
|--------------------------|-----------|-----------------|------------|
|                          | age + sex | PRS + age + sex | Difference |
| Body mass index          | 0.02      | 0.09            | 0.07       |
| Systolic blood pressure  | 0.01      | 0.03            | 0.02       |
| Diastolic blood pressure | 0.00      | 0.03            | 0.02       |
| High density lipoprotein | 0.01      | 0.11            | 0.10       |
| Low density lipoprotein  | 0.03      | 0.08            | 0.05       |
| Triglycerides            | 0.01      | 0.04            | 0.03       |
| Apolipoprotein A-I       | 0.02      | 0.10            | 0.08       |
| Apolipoprotein B         | 0.03      | 0.11            | 0.08       |
| C-reactive protein       | 0.04      | 0.07            | 0.03       |
| Vitamin D                | 0.01      | 0.03            | 0.02       |

**Table S6: P-values for trend across polygenic risk scores determined deciles**

| Trait                    | P-value for trend |
|--------------------------|-------------------|
| Body mass index          | 8.00E-96          |
| Systolic blood pressure  | 3.00E-30          |
| Diastolic blood pressure | 9.00E-32          |
| HDL cholesterol          | 1.00E-98          |
| LDL cholesterol          | 5.00E-55          |
| Triglycerides            | 9.00E-23          |
| Apolipoprotein A-I       | 3.00E-78          |
| Apolipoprotein B         | 1.00E-75          |
| C-reactive protein       | 7.00E-05          |

|                     |          |
|---------------------|----------|
| Vitamin D           | 1.00E-14 |
| non-HDL cholesterol | 3.00E-64 |

**Figure S1: An error plot demonstrating a linear trend across deciles of non-HDL cholesterol using the apolipoprotein B polygenic risk score in ALSPAC**

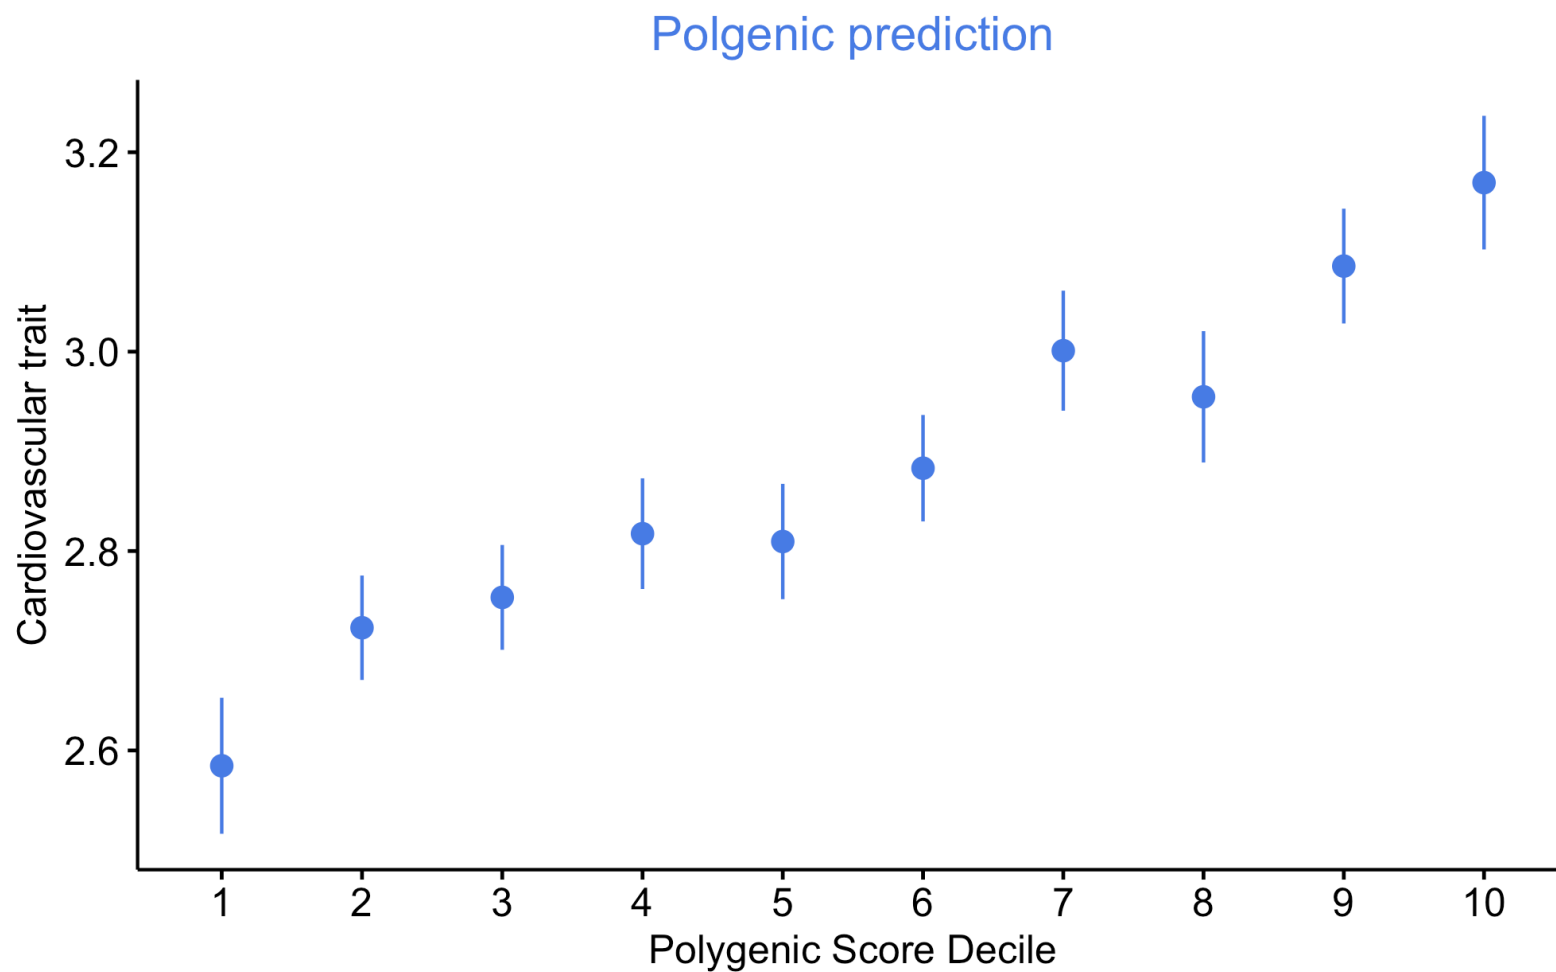

## Major Resource Table

### Animals (in vivo studies)

| Species | Vendor or Source | Background Strain | Sex | Persistent ID / URL |
|---------|------------------|-------------------|-----|---------------------|
| NA      |                  |                   |     |                     |

### Genetically Modified Animals

|                 | Species | Vendor or Source | Background Strain | Other Information | Persistent ID / URL |
|-----------------|---------|------------------|-------------------|-------------------|---------------------|
| Parent - Male   | NA      |                  |                   |                   |                     |
| Parent - Female | NA      |                  |                   |                   |                     |

### Antibodies

| Target antigen | Vendor or Source | Catalog # | Working concentration | Lot # (preferred but not required) | Persistent ID / URL |
|----------------|------------------|-----------|-----------------------|------------------------------------|---------------------|
| NA             |                  |           |                       |                                    |                     |

### DNA/cDNA Clones

| Clone Name | Sequence | Source / Repository | Persistent ID / URL |
|------------|----------|---------------------|---------------------|
| NA         |          |                     |                     |

### Cultured Cells<sup>7</sup>

| Name | Vendor or Source | Sex (F, M, or unknown) | Persistent ID / URL |
|------|------------------|------------------------|---------------------|
| NA   |                  |                        |                     |

### Data & Code Availability

| Description                                                            | Source / Repository | Persistent ID / URL                                                                                                   |
|------------------------------------------------------------------------|---------------------|-----------------------------------------------------------------------------------------------------------------------|
| Data from the ALSAPC cohort is available upon an approved application. | ALSPAC              | <a href="http://www.bristol.ac.uk/alspac/researchers/access/">http://www.bristol.ac.uk/alspac/researchers/access/</a> |

|                                                                            |            |                                                                                                                                                   |
|----------------------------------------------------------------------------|------------|---------------------------------------------------------------------------------------------------------------------------------------------------|
| Data from the UK Biobank cohort is available upon an approved application. | UK Biobank | <a href="https://www.ukbiobank.ac.uk/enable-your-research/apply-for-access">https://www.ukbiobank.ac.uk/enable-your-research/apply-for-access</a> |
|----------------------------------------------------------------------------|------------|---------------------------------------------------------------------------------------------------------------------------------------------------|

**Other**

| Description | Source / Repository | Persistent ID / URL |
|-------------|---------------------|---------------------|
| NA          |                     |                     |
